# Supplementary material
Source: publisher figshare collection journal article supplement (https://acs.figshare.com/ndownloader/files/14229476)
Supplement: Supplementary file 1 [file 14229476]

Compound	SMILE	ELISA-based screening (% HOXA9/DNA binding relatively to control)	EMSA (% HOXA9 binding at 5æM Cpd)	Conclusion on HOXA9 inhibitory effect	Tm R=2 (øC)	Nuclear localisation	MTS (IC50) on MigA9	PI-positive cells (48H) 1æM	PI-positive cells (48H) 10æM	PI-positive cells (48H) 20æM	%Sub-G1 (48H) 1æM	%Sub-G1 (48H) 10æM	%Sub-G1 (48H) 20æM
DB75	N=C(N)C(C=C1)=CC=C1C2=CC=C(C3=CC=C(C(N)=N)C=C3)O2	60.1 +/- 10.4		Inactive		Yes
DB351	N=C(N)C(C=C1)=CC=C1C2=CC=C(C3=CC=C(C(N)=N)C=C3)S2	69.6 +/- 1.2		Inactive
DB262	N=C(N)C(C=C1)=CC=C1C2=CC=C(C3=CC=C(C(N)=N)C=C3)N2	65.9 +/- 2.3		Inactive
DB1751	N=C(N)C(C=C1)=CC=C1C2=CC=C(C3=CC=C(C(N)=N)C=C3)[Te]2	60.9 +/- 1.3		Inactive		Not fluorescent in microscopy experiment
DB484	N=C(N)C(C=C1)=CC=C1C2=CN=C(C3=CC=C(C(N)=N)C=C3)O2	66.3 +/- 2.6	103.2	Inactive
DB1620	N=C(N)C(C=C1)=CC=C1C2=CN=C(C3=CC=C(C(N)=N)C=C3)S2	35.3 +/- 5.8	42.18	Low	5.6 +/- 1.1	Yes	23.93 +/- 0.86			22.90 +/- 2.36			1.71 +/- 0.06
DB421	N=C(NCCC1=CC=C([N+]([O-])=O)C=C1)C(C=C2)=CC=C2C3=CC=C(C4=CC=C(C(NCCC5=CC=C([N+]([O-])=O)C=C5)=N)C=C4)O3	63.7 +/- 1.4		Inactive
DB883	N=C(C1=NC=CC=C1)NC(C=C2)=CC=C2C3=CC=C(C4=CC=C(NC(C5=CC=CC=N5)=N)C=C4)N3	44.2 +/- 9.2	12.67 +/- 2.26	Medium	5.1 +/- 1.3	Yes	3.87 +/- 0.17	17.60 +/- 1.06			1.04 +/- 0.35
DB884	N=C(C1=CC=CC=C1)NC(C=C2)=CC=C2C3=CC=C(C4=CC=C(NC(C5=CC=CC=C5)=N)C=C4)N3	14.3 +/- 3.0	4.04 +/- 1.24	High	8.0 +/- 0.4	Yes	2.14 +/- 0.26	99.33 +/- 0.15			na
DB293	N=C(N)C(C=C1)=CC=C1C2=CC=C(C3=NC4=C(C=C(C(N)=N)C=C4)N3)O2	61.7 +/- 13.2	93.95	Inactive		Yes
DB995	N=C(N)C(N=C1)=CC=C1C2=CC=C(C3=NC4=C(C=C(C(N)=N)C=C4)N3)O2	105.2 +/- 1.8	100.7	Inactive		Yes
DB915	N=C(N)C(C=N1)=CC=C1C2=CC=C(C3=NC4=C(C=C(C(N)=N)C=C4)N3)O2	83.5 +/- 3.9		Inactive		Yes
DB928	N=C(N)C(C=C1O)=CC=C1C2=CC=C(C3=NC4=C(C=C(C(N)=N)C=C4)N3)O2	95.9 +/- 2.2		Inactive		Yes
DB850	N=C(N)C(C=C1C)=CC=C1C2=CC=C(C3=NC4=C(C=C(C(N)=N)C=C4)N3)O2	107.0 +/- 5.3		Inactive		Yes
DB1478	N=C(N)C(C=C1)=CC=C1C2=CC=C(C3=CC(C=C(C(N)=N)C=C4)=C4N3)O2	98.1 +/- 15.3		Inactive
DB1481	N=C(N)C(C=N1)=CC=C1C2=CC=C(C3=CC(C=C(C(N)=N)C=C4)=C4N3)O2	105.3 +/- 17.7		Inactive		Yes
DB1878	N=C(N)C(C=C1)=CC=C1C2=CC=C(C3=CC4=C(C=C(C(N)=N)C=C4)N3)O2	36.5 +/- 8.1	43.29 +/- 1.55	Low	10.4 +/- 1.6	Yes	6.34 +/- 1.41		44.93 +/- 1.03			15.94 +/- 1.80
DB2005	N=C(N)C(C=C1)=CC(OC)=C1C2=CC=C(C3=CC4=C(C=C(C(N)=N)C=C4)N3)O2	95.3 +/- 1.6		Inactive		Yes
DB2430	N=C(N)C(C=C1)=CC=C1C2=CC=C(C3=NC(C=C(C(N)=N)C=C4)=C4N3C)O2	66.1 +/- 5.9	77.01 +/- 7.79	Inactive		Yes
DB818	N=C(N)C(C=C1)=CC=C1C2=CC=C(C3=NC4=C(C=C(C(N)=N)C=C4)N3)S2	20.4 +/- 3.9	2.92 +/- 0.94	High	12.8 +/- 1.6	Yes	9.97 +/- 2.40		29.40 +/- 3.29	75.53 +/- 0.60		9.46 +/- 1.91	12.00 +/- 0.90
DB2651	N=C(N)C(C=C1)=CC=C1C2=CN=C(C3=NC4=C(C=C(C(N)=N)C=C4)N3)S2	61.9 +/- 9.8		Inactive
DB1879	N=C(N)C(C=C1)=CC=C1C2=CC=C(C3=CC4=C(C=C(C(N)=N)C=C4)N3)S2	8.7 +/- 2.3	2.78 +/- 1.59	High	13.0 +/- 1.1	Yes	3.58 +/- 0.92		98.17 +/- 0.20			na
DB2529	N=C(N)C(C=N1)=CC=C1C2=CC=C(C3=CC4=C(C=C(C(N)=N)C=C4)N3)S2	16.8 +/- 4.8	3.84 +/- 2.34	High	10.5 +/- 1.0	Yes	2.24 +/- 0.22		96.03 +/- 0.77			na
DB2429	N=C(N)C(C=C1)=CC=C1C2=CC=C(C3=NC(C=C(C(N)=N)C=C4)=C4N3C)S2	79.7 +/- 6.2	74.44 +/- 22.23	Inactive		Yes
DB2223	N=C(N)C(C=C1)=CC=C1N2C=CC(C3=NC4=C(C=C(C(N)=N)C=C4)N3)=N2	13.5 +/- 3.9	11.57 +/- 4.55	Medium	4.9 +/- 0.2	Not fluorescent in microscopy experiment	>50			6.72 +/- 0.18			0.67 +/- 0.17
DB2572	N=C(C1=CC=C2N(C)C(C3=CC=C(C4=CC=C(C5=NC6=CC(C(N)=N)=CC=C6N5C)C=C4)S3)=NC2=C1)N	97.6 +/- 7.5	94.90 +/- 5.20	Inactive		Yes
DB828	N=C(N)C(C=C1)=CC=C1C2=CC=C(C3=NC(C=C(C(N)=N)C=C4)=C4O3)O2	109.3 +/- 7.4	83.88 +/- 2.31	Inactive	5.1 +/- 0.1	Yes	>50			7.77 +/- 0.10			0.92 +/- 0.19
DB2708	N=C(N)C(C=C1)=CC=C1C2=CC=C(C3=NC4=C(C=CC(C5=CC=C(C(N)=N)C=C5)=C4)N3C(C)C)S2	52.8 +/- 7.6		Inactive		Yes
DB1504	N=C(N)C(C=C1)=CC=C1C2=CC=C(C3=CC(C=C(C(N)=N)C=C4)=C4N=C3)S2	71.3 +/- 10.8		Inactive
DB1055	N=C(N)C1=CC=CC(C2=CC=C(C3=NC4=C(C=C(C(N)=N)C=C4)N3)C=C2)=C1	23.1 +/- 4.2	4.67 +/- 1.04	High	12.0 +/- 1.1		14.09 +/- 1.69			9.45 +/- 0.52			1.65 +/- 0.37
DB911	NC(C(C=C1)=CC2=C1N=C(N2)C3=CC(C4=CC=C(C(N)=N)C=C4)=CC=C3)=N	81.4 +/- 19.7	38.8 +/- 12.68	Low
DB1314	NC(C(C=C1)=CC2=C1N=C(N2C)C3=CC(C4=CC=C(C(N)=N)C=C4)=CC=C3)=N	90.8 +/- 6.2		Inactive
DB1175	N=C(N)C1=CC=C(C2=CC=CC(C3=CC(C=C(C(N)=N)C=C4)=C4C=C3)=C2)C=C1	93.1 +/- 18.8		Inactive
DB1177	NC(C(C=C1)=CC2=C1C=CC(C3=CC=C(C4=CC=C(C(N)=N)C=C4)C=C3)=C2)=N	43.3 +/- 8.6	13.45 +/- 0.90	Medium	9.1 +/- 0.8	Yes
DB1210	NC(C1=CC=C(C2=NC(C3=CC=C(C(N)=N)C=C3)=CN=C2)C=C1)=N	83.5 +/- 2.4		Inactive
DB1302	NC(C(C=C1)=CC2=C1N(C)C(C(C=C3)=CC=C3C4=CC=C(C(N)=N)C=C4)=N2)=N	65.4 +/- 6.0		Inactive		Yes
DB1263	NC(C1=CC(CC(C=C2)=CC=C2C3=CC=C(C(N)=N)C=C3)=CC=C1)=N	108.7 +/- 11.4		Inactive
DB877	NC(C(C=C1)=CN(C1=N2)C=C2C(C=C3)=CC=C3C4=CC=C(C(N)=N)C=C4)=N	92.6 +/- 17.7		Inactive
DB1798	NC(C(C=C1)=CC(C1N2)C=C2C(C=C3)=CC=C3C4=CC=C(C(N)=N)C=C4)=N	69.4 +/- 1.1		Inactive
